# Supplementary material for: Size-selective synthesis of mesoporous LiFePO4/C microspheres based on nucleation and growth rate control of primary particles
Source: Royal Society of Chemistry journal article supplement (doi:10.1039/c4ta00210e), 2014-01-01
Supplement: c4ta00210e1.pdf [file c4ta00210e1.pdf]

## Size-Selective Synthesis of Mesoporous LiFePO<sub>4</sub>/C Microspheres based on Nucleation and Growth Rate Control of Primary Particles

Min-Young Cho<sup>a,b</sup>, Haegyeom Kim<sup>c</sup>, Hyungsub Kim<sup>c</sup>, Young Su Lim<sup>a</sup>, Kwang-Bum Kim<sup>b</sup>, Jae-Won Lee<sup>d</sup>, Kisuk Kang<sup>c,e\*</sup>, Kwang Chul Roh<sup>a,\*</sup>

<sup>a</sup> Energy Materials Center, Green Ceramics Division, Korea Institute of Ceramic Engineering & Technology, 233-5 Gasan-dong, Guemcheon-Gu, Seoul 153-801, Republic of Korea.

<sup>b</sup> Department of Materials Science & Engineering, Yonsei University, 50 Yonsei-ro, Seodaemun-Gu, Seoul 120-749, Republic of Korea.

<sup>c</sup> Department of Materials Science and Engineering, Seoul National University, 599 Gwanak-ro, Gwanak-gu, Seoul 151-741, Republic of Korea.

<sup>d</sup> Department of Energy Engineering, Dankook University, Cheonan 330-714, Republic of Korea.

<sup>e</sup> Center for Nanoparticle Research, Institute for Basic Science (IBS), Seoul National University, 1 Gwanak-ro, Gwanak-gu, Seoul 151-742, Republic of Korea.

E-mail: [rkc@kicet.re.kr](mailto:rkc@kicet.re.kr) (Kwang Chul Roh)

E-mail: [matlgen1@snu.ac.kr](mailto:matlgen1@snu.ac.kr) (Kisuk Kang)

## Electronic Supplementary Information (ESI†)

### CONTENTS

|                                                                                        | Page |
|----------------------------------------------------------------------------------------|------|
| <b>Table S1</b> Lattice parameter.....                                                 | 3    |
| <b>Table S2</b> Carbon<br>contents.....                                                | 3    |
| <b>Table S3</b> Rietveld refinement results and antisite defects<br>concentration..... | 3    |
| <b>Fig. S1</b> FE-SEM images of precursors.....                                        | 4    |
| <b>Fig. S2</b> Nitrogen adsorption-desorption curves.....                              | 4    |
| <b>Fig. S3</b> Rietveld refinements.....                                               | 5    |

**Table S1** Lattice parameters and unit cell volumes for LFP/C

| Sample   | Lattice parameter    |                      |                      | Unit cell volume ( $\text{\AA}^3$ ) |
|----------|----------------------|----------------------|----------------------|-------------------------------------|
|          | $a$ ( $\text{\AA}$ ) | $b$ ( $\text{\AA}$ ) | $c$ ( $\text{\AA}$ ) |                                     |
| C1-LFP/C | 10.312991(18)        | 5.997994(9)          | 4.688861(8)          | 290.0401                            |
| C2-LFP/C | 10.315160(18)        | 5.998934(10)         | 4.689956(8)          | 290.2143                            |
| C3-LFP/C | 10.314023(18)        | 5.998675(10)         | 4.689209(8)          | 290.1235                            |

**Table S2** Carbon contents determined by the carbon/sulfur (CS) determinator for the precursors and LFP/C

| Sample        | C1-LFP   | C2LFP    | C3LFP    |
|---------------|----------|----------|----------|
| Carbon (wt %) | 0.06     | 0.11     | 0.08     |
| Sample        | C1-LFP/C | C2-LFP/C | C3-LFP/C |
| Carbon (wt %) | 3.13     | 3.62     | 3.67     |

**Table S3.** Rietveld refinement results and antisite defect concentrations for C1-LFP/C, C2-LFP/C, and C3-LFP/C.

| Sample                     | Atom             | Site | Multiplicity | $X$         | $Y$       | $Z$       | $B_{\text{iso}}$ | Occupancy |
|----------------------------|------------------|------|--------------|-------------|-----------|-----------|------------------|-----------|
| C1-LFP/C                   | Li <sup>+1</sup> | Li1  | 4            | 0           | 0         | 0         | 3.7(3)           | 0.97996   |
|                            | Fe <sup>+2</sup> | Li1  | 4            | 0           | 0         | 0         | 3.7(2)           | 0.02004   |
|                            | P                | P1   | 4            | 0.09568(16) | 0.25000   | 0.4187(3) | 0.94(5)          | 1.00000   |
| Antisite defects<br>2.004% | O <sup>-2</sup>  | O1   | 4            | 0.0957(4)   | 0.25000   | 0.7419(7) | 0.56(10)         | 1.00000   |
|                            | O <sup>-2</sup>  | O2   | 4            | 0.4562(4)   | 0.25000   | 0.2083(7) | 0.76(9)          | 1.00000   |
|                            | O <sup>-2</sup>  | O3   | 8            | 0.1655(3)   | 0.0462(4) | 0.2850(4) | 0.65(7)          | 1.00000   |
| C2-LFP/C                   | Li <sup>+1</sup> | Li1  | 4            | 0           | 0         | 0         | 3.1(2)           | 0.98008   |
|                            | Fe <sup>+2</sup> | Li1  | 4            | 0           | 0         | 0         | 3.1(2)           | 0.01992   |
|                            | P                | P1   | 4            | 0.09545(16) | 0.25000   | 0.4182(3) | 1.37(5)          | 1.00000   |
| Antisite defects<br>1.992% | O <sup>-2</sup>  | O1   | 4            | 0.0959(4)   | 0.25000   | 0.7424(8) | 1.22(10)         | 1.00000   |
|                            | O <sup>-2</sup>  | O2   | 4            | 0.4561(4)   | 0.25000   | 0.2092(7) | 0.99(9)          | 1.00000   |
|                            | O <sup>-2</sup>  | O3   | 8            | 0.1643(3)   | 0.0472(4) | 0.2839(4) | 1.22(7)          | 1.00000   |
| C3-LFP/C                   | Li <sup>+1</sup> | Li1  | 4            | 0           | 0         | 0         | 2.4(2)           | 0.98000   |
|                            | Fe <sup>+2</sup> | Li1  | 4            | 0           | 0         | 0         | 2.4(2)           | 0.02000   |
|                            | P                | P1   | 4            | 0.09520(17) | 0.25000   | 0.4189(4) | 1.19(5)          | 1.00000   |
| Antisite defects<br>2.000% | O <sup>-2</sup>  | O1   | 4            | 0.0939(4)   | 0.25000   | 0.7430(8) | 1.06(11)         | 1.00000   |
|                            | O <sup>-2</sup>  | O2   | 4            | 0.4562(4)   | 0.25000   | 0.2139(7) | 0.60(9)          | 1.00000   |
|                            | O <sup>-2</sup>  | O3   | 8            | 0.1633(3)   | 0.0474(5) | 0.2839(5) | 0.92(8)          | 1.00000   |

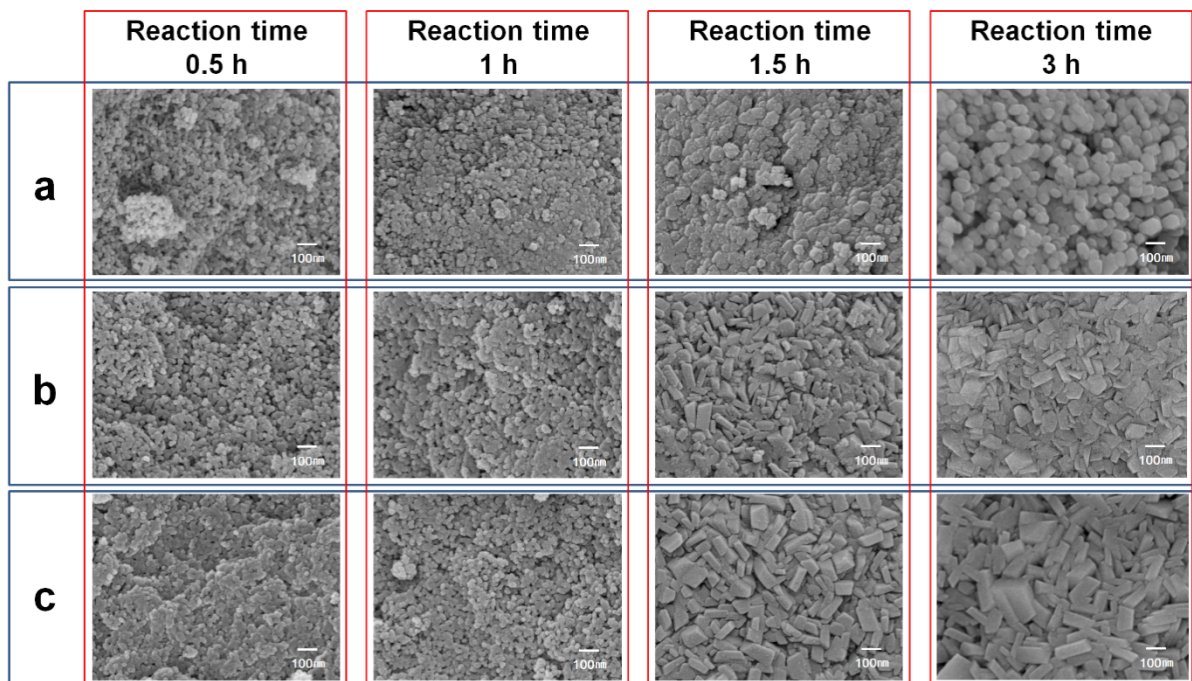

**Fig. S1** Surface FE-SEM images of as-prepared precursors for different reaction times. (a) C1-LFP, (b) C2-LFP, and (c) C3-LFP. The morphologies and sizes of primary particles changed depending on the CTAB concentration.

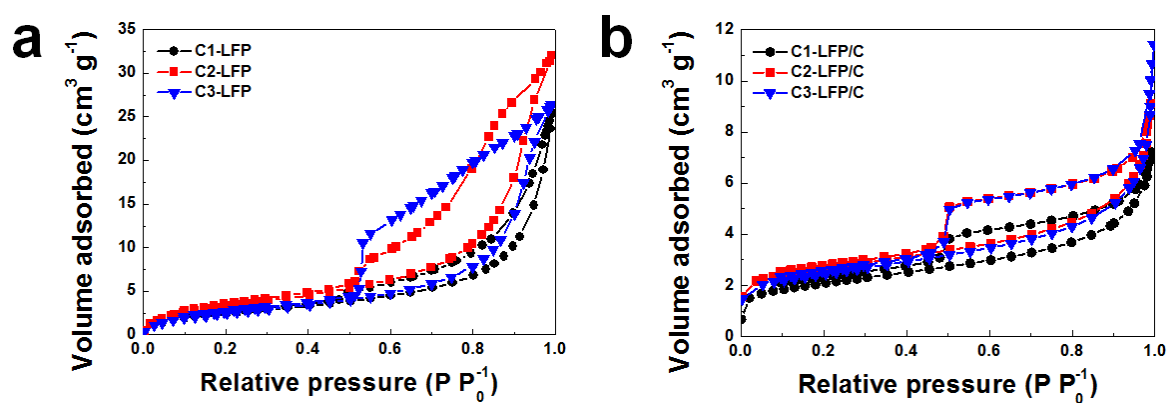

**Fig. S2** Nitrogen adsorption-desorption curves. The precursors and LFP/C particles show type-IV isotherms with large type H2 hysteresis loops, indicating the mesoporous structure.

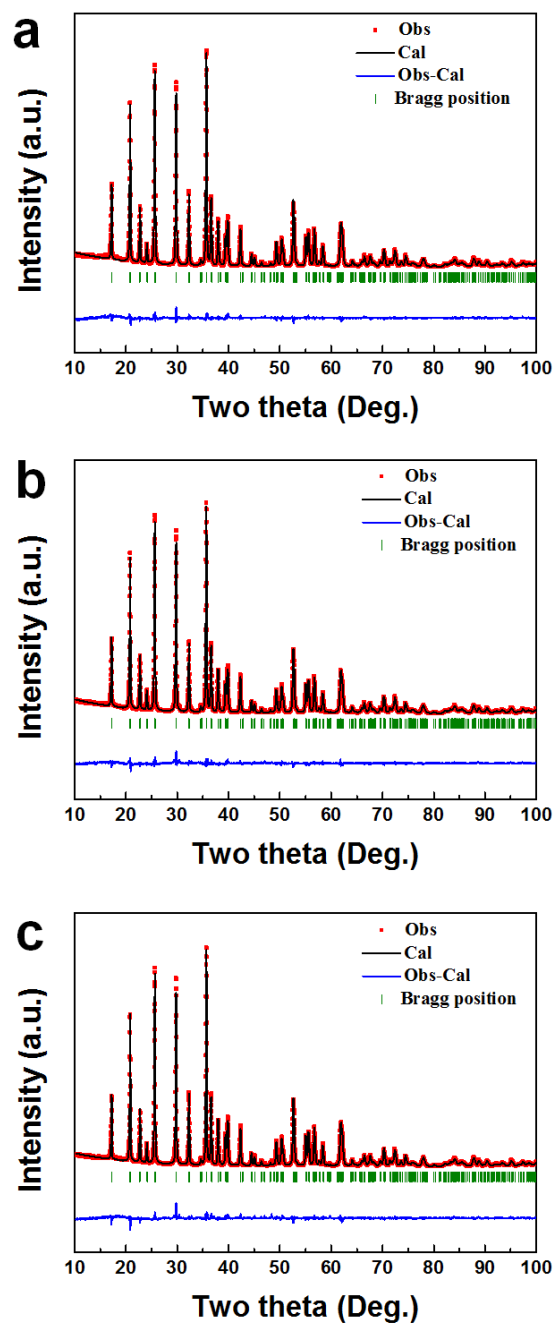

**Fig. S3.** Rietveld refinements of the XRD patterns for (a) C1-LFP/C, (b) C2-LFP/C, and (c) C3-LFP/C. The  $R$ -factors for the XRD patterns are  $R_p = 6.75\%$ ,  $R_I = 7.86\%$ ,  $R_F = 2.98\%$ , and  $S = 0.795$ ;  $R_p = 5.04\%$ ,  $R_I = 7.98\%$ ,  $R_F = 3.40\%$ , and  $S = 0.816$ ; and  $R_p = 5.73\%$ ,  $R_I = 8.04\%$ ,  $R_F = 4.19\%$ , and  $S = 1.01$  for C1-LFP/C, C2-LFP/C, and C3-LFP/C, respectively.
